# Supplementary material
Source: HighWire-hosted journal article supplement (https://jnm.snmjournals.org/highwire/filestream/99797/field_highwire_adjunct_files/0/243782_Supplemental_Data.pdf)
Supplement: 243782_Supplemental_Data.pdf [file 243782_Supplemental_Data.pdf]

## Supplemental Data

### Number of Radiation Induced Foci

|         | Control   | 5 min             | 30 min            | 4h                | 24h               | 48h               | 72h                 | 144h                |
|---------|-----------|-------------------|-------------------|-------------------|-------------------|-------------------|---------------------|---------------------|
| PSMA    | 0.22±0.09 | 4.37±2.18<br>(**) | 3.36±1.54<br>(**) | 1.81±1.17<br>(**) | 0.75±0.39<br>(**) | 0.42±0.29<br>(*)  | 0.21±0.17<br>(n.s.) | 0.09±0.05<br>(n.s.) |
| DOTATOC | 0.27±0.18 | 3.51±2.76<br>(**) | 3.05±2.07<br>(**) | 1.54±0.92<br>(**) | 0.91±0.50<br>(**) | 0.60±0.41<br>(**) | 0.50±0.44<br>(**)   | 0.08±0.04<br>(n.s.) |
| Total   | 0.25±0.15 | 3.93±2.51<br>(**) | 3.20±1.82<br>(**) | 1.67±1.04<br>(**) | 0.83±0.45<br>(**) | 0.53±0.37<br>(**) | 0.39±0.39<br>(n.s.) | 0.09±0.04<br>(n.s.) |

Table 1: Average and standard deviation of radiation induced foci on blood lymphocytes at different post-injection time-points for patients who underwent Lu-177-DOTATOC or -PSMA therapy. The control value is given as absolute value of foci per blood leukocyte. Two asterisks (\*\*) indicate that Wilcoxon signed rank testing rated differences between the RIF at a respective time point and the control value as significant ( $p < 0.01$ ), one asterisk as significant ( $p < 0.05$ ), and n.s. as non-significant.

### Dose-Rate in Peripheral Blood

|         | 1h           | 4h           | 24h         | 48h         | 72h         | 144h        |
|---------|--------------|--------------|-------------|-------------|-------------|-------------|
| PSMA    | 20.75 ± 6.62 | 11.08 ± 4.50 | 2.29 ± 1.30 | 0.95 ± 0.54 | 0.47 ± 0.31 | 0.12 ± 0.20 |
| DOTATOC | 12.63 ± 4.74 | 6.14 ± 2.32  | 0.73 ± 0.49 | 0.34 ± 0.22 | 0.21 ± 0.15 | 0.08 ± 0.07 |
| Total   | 16.36 ± 6.94 | 8.41 ± 4.25  | 1.44 ± 1.22 | 0.62 ± 0.50 | 0.33 ± 0.26 | 0.10 ± 0.15 |

Table 2: Average and standard deviation of absorbed dose rate to the blood in mGy/h at different nominal post-injection time-points for patients who underwent Lu-177-DOTATOC or -PSMA therapy.

### Absorbed Dose in Peripheral Blood

|         | 1h         | 4h          | 24h          | 48h          | 72h          | 144h         |
|---------|------------|-------------|--------------|--------------|--------------|--------------|
| PSMA    | 23.8 ± 7.7 | 69.5 ± 22.4 | 161.9 ± 63.2 | 197.5 ± 78.2 | 213.8 ± 84.2 | 230.4 ± 86.4 |
| DOTATOC | 15.0 ± 6.6 | 41.7 ± 15.1 | 80.6 ± 30.0  | 91.6 ± 33.7  | 97.7 ± 35.2  | 106.4 ± 37.5 |
| Total   | 19.0 ± 8.3 | 54.4 ± 23.3 | 117.9 ± 62.8 | 140.1 ± 78.6 | 150.9 ± 85.1 | 163.2 ± 89.4 |

Table 3: Average and standard deviation of absorbed dose values to the blood in mGy at different nominal post-injection time-points for patients who underwent Lu-177-DOTATOC or -PSMA therapy.
